# Supplementary material for: Prevalence Of Intestinal Parasites And Associated Risk Factors Among HIV/AIDS Patients Attending At Anti-Retroviral Treatment (ART) Clinic At Mizan-Tepi University Teaching Hospital, Southwest Ethiopia.
Source: Research Square preprint supplement (doi:10.21203/rs.3.rs-1304850/v1), 2022-02-21
Supplement: Supplementary file 1 [file bac21b6ae505d5fd7f76e882.docx]

| **HIV/AIDS patients attending at ART clinic**  n=191  Socio-demographic and clinical risk factors data collected.  Stool sample was collected and processed using;   - Direct wet mount, - Formol-ether concentration and - Modified Ziehl-Neelson staining techniques.   Main findings  67 (35.1%) were positive for intestinal parasites   - 31.5% (45/143) from patients on-ART and - 45.8% (22/48) from ART naïve group   Factors showing significant association with prevalence of intestinal parasite;   - Drinking untreated water, - Consuming raw food, - Eating unwashed raw vegetables; - CD4 count <200cells/ mm3, - CD4 count 200-500cells/mm3, - WHO stage II and III, and - Viral load ≥150 copies/ml |
| --- |
